# Supplementary material for: Reengineering of MeSH thesauri for term selection to optimize literature retrieval and knowledge reconstruction in support of stem cell research
Source: BMC Med Inform Decis Mak. 2016 May 23;16:54. doi: 10.1186/s12911-016-0298-z (PMC4878086; doi:10.1186/s12911-016-0298-z)
Supplement: Additional file 3: — Stem cell research journal list and collected MeSH terms with frequencies. (XLSX 98 kb) [file 12911_2016_298_MOESM3_ESM.xlsx]

## Sheet: Stem Cell Journals
1. Stem Cells Transl Med
2. Stem Cell Res Ther
3. Stem Cells Int
4. World J Stem Cells
5. Stem Cells Cloning
6. Cell Stem Cel
7. Curr Protoc Stem Cell Biol
8. Stem Cell Res
9. Curr Stem Cell Res Ther
10. J Stem Cells Regen Med
11. J Stem Cells
12. Stem Cell Rev
13. Stem Cells Dev
14. Stem Cells
15. J Hematother
16. Int J Cell Cloning
17. Stem Cells

## Sheet: Collected MeSH terms
Term frequency	MeSH Headings
3169	Animals
2989	Humans
2123	Mice
2120	Cell Differentiation
1247	Embryonic Stem Cells
1196	Cells, Cultured
992	Stem Cells
860	Cell Proliferation
725	Female
702	Mesenchymal Stromal Cells
610	Male
583	Cell Line
494	Cell Lineage
486	Neurons
481	Cell Culture Techniques
481	Stem Cell Transplantation
467	Signal Transduction
436	Hematopoietic Stem Cells
427	Mice, Inbred C57BL
426	Bone Marrow Cells
422	Flow Cytometry
417	Pluripotent Stem Cells
389	Biological Markers
378	Gene Expression Regulation
370	Rats
346	Reverse Transcriptase Polymerase Chain Reaction
344	Gene Expression Profiling
314	Cell Separation
308	Adult
286	Immunohistochemistry
267	Cell Survival
266	Gene Expression Regulation, Developmental
265	Cell Movement
247	Models, Biological
244	Induced Pluripotent Stem Cells
238	Phenotype
237	Transcription Factors
235	Homeodomain Proteins
232	Adult Stem Cells
225	Fibroblasts
223	Mesenchymal Stem Cell Transplantation
220	Neoplastic Stem Cells
216	Coculture Techniques
211	Mice, SCID
204	Mice, Transgenic
202	Stromal Cells
201	Octamer Transcription Factor-3
196	Time Factors
195	Apoptosis
195	Regeneration
193	Gene Expression
186	Green Fluorescent Proteins
182	Antigens, CD34
172	Antigens, CD
170	RNA, Messenger
162	Blotting, Western
162	Embryo, Mammalian
161	Middle Aged
160	Mice, Knockout
160	Multipotent Stem Cells
157	Disease Models, Animal
153	Endothelial Cells
152	Adipose Tissue
150	Fetal Blood
145	Nerve Tissue Proteins
144	Cell Cycle
144	Oligonucleotide Array Sequence Analysis
141	Osteogenesis
140	Antigens, Differentiation
137	Pregnancy
136	Myocytes, Cardiac
135	Hematopoietic Stem Cell Transplantation
134	Nuclear Reprogramming
132	Mesoderm
131	Transfection
130	Tissue Engineering
127	Epithelial Cells
127	Hematopoiesis
123	Colony-Forming Units Assay
121	Promoter Regions, Genetic
120	SOXB1 Transcription Factors
118	Transcription, Genetic
116	Neural Stem Cells
115	Cell Line, Tumor
115	Fluorescent Antibody Technique
115	Rats, Sprague-Dawley
115	Transplantation, Heterologous
113	Regenerative Medicine
112	Genetic Vectors
112	Polymerase Chain Reaction
110	Cell Division
110	Stem Cell Niche
107	Cell Shape
107	Cytokines
106	Bone Marrow Transplantation
105	Neoplasms
103	Transduction, Genetic
102	Epigenesis, Genetic
101	Neurogenesis
100	Membrane Proteins
99	Mice, Nude
96	Brain
96	Mice, Inbred NOD
96	Wnt Proteins
95	Cell Adhesion
95	Liver
94	Mice, Inbred BALB C
93	Culture Media, Conditioned
93	Karyotyping
93	Myocardium
91	Aged
91	Peptides
91	Up-Regulation
89	Clone Cells
89	Glycoproteins
89	Teratoma
88	Cell Count
87	Intercellular Signaling Peptides and Proteins
87	Tissue Therapy
86	RNA Interference
85	Neovascularization, Physiologic
84	DNA-Binding Proteins
83	RNA, Small Interfering
82	Nuclear Proteins
82	Repressor Proteins
81	Lentivirus
80	Genes, Reporter
80	Osteoblasts
79	Adipocytes
78	DNA Methylation
76	Endoderm
75	Immunophenotyping
75	Recombinant Proteins
73	Fibroblast Growth Factor 2
71	Embryo Research
70	Bone Marrow
70	Transplantation, Homologous
69	Culture Media
69	Transgenes
68	Molecular Sequence Data
68	Myocardial Infarction
67	Base Sequence
67	Kruppel-Like Transcription Factors
67	MicroRNAs
67	Muscle, Skeletal
67	T-Lymphocytes
67	Wound Healing
66	Adipogenesis
66	Animals, Newborn
66	Down-Regulation
66	Receptors, Notch
65	Fetus
64	Adolescent
64	Cell Transformation, Neoplastic
63	Basic Helix-Loop-Helix Transcription Factors
63	Cell Aging
63	Hepatocytes
63	Phosphorylation
63	Receptors, CXCR4
62	Biomedical Research
62	Gene Expression Regulation, Neoplastic
62	Mutation
62	Organ Specificity
62	Trans-Activators
62	Transforming Growth Factor beta
61	Clinical Trials as Topic
61	Rats, Wistar
60	Cell Communication
60	Chemokine CXCL12
60	Treatment Outcome
59	Blastocyst
59	Extracellular Matrix
59	Protein Binding
58	Astrocytes
58	Bone Morphogenetic Proteins
58	Vascular Endothelial Growth Factor A
57	Aging
57	beta Catenin
57	Chondrogenesis
57	Histones
57	Neuroglia
55	Heart
55	Recombinant Fusion Proteins
54	Embryonic Development
54	Umbilical Cord
53	Germ Cells
53	Graft Survival
53	Intermediate Filament Proteins
52	Collagen
52	Transplantation, Autologous
51	Brain Neoplasms
51	Chondrocytes
51	Dopamine
51	Enzyme Activation
51	Gene Knockdown Techniques
51	Hedgehog Proteins
51	Spheroids, Cellular
50	Embryoid Bodies
50	Proto-Oncogene Proteins c-myc
50	Skin
49	Antigens, Surface
49	Culture Media, Serum-Free
49	Proteoglycans
48	Bone Morphogenetic Protein 4
48	Cell Transplantation
48	Enzyme Inhibitors
48	Genetic Therapy
48	Tretinoin
48	Young Adult
47	Homeostasis
47	Microscopy, Confocal
47	Oligodendroglia
46	Cell Transdifferentiation
46	Child
46	Cryopreservation
46	Gene Transfer Techniques
46	Insulin
46	Stem Cell Research
46	Tumor Cells, Cultured
45	Alkaline Phosphatase
45	Antigens, CD45
45	Cord Blood Stem Cell Transplantation
45	Kinetics
45	Models, Animal
45	Transcriptional Activation
44	Cadherins
44	Microscopy, Fluorescence
44	Reproducibility of Results
44	Spinal Cord Injuries
44	Testis
44	Tissue Scaffolds
43	Cell Fusion
43	Retina
42	Blood Vessels
42	Cell Hypoxia
42	Hematopoietic Stem Cell Mobilization
42	Lung
42	Neural Crest
42	Tumor Markers, Biological
42	Tumor Suppressor Protein p53
41	Breast Neoplasms
41	Calcium
41	Chromatin Immunoprecipitation
41	Neoplasm Transplantation
41	Proto-Oncogene Proteins
41	Proto-Oncogene Proteins c-kit
40	Cell Nucleus
40	Muscle Development
40	Nerve Regeneration
40	Retroviridae
40	Telomerase
39	DNA
39	Glioblastoma
39	Hair Follicle
39	Laminin
39	Reactive Oxygen Species
39	Swine
38	Glioma
38	Insulin-Secreting Cells
38	Nuclear Transfer Techniques
38	Rats, Inbred F344
38	Staining and Labeling
37	Hippocampus
37	Infant, Newborn
36	Cell Death
36	Cell Membrane
36	Extracellular Signal-Regulated MAP Kinases
36	Germ Layers
35	Activins
35	Bone and Bones
35	Carrier Proteins
35	Leukemia Inhibitory Factor
34	Antineoplastic Agents
34	Granulocyte Colony-Stimulating Factor
34	Inflammation
34	Keratinocytes
34	Kidney
34	Neoplasm Proteins
34	Placenta
33	Aged, 80 and over
33	Cell Adhesion Molecules
33	Central Nervous System
33	DNA Primers
33	Gene Silencing
33	Vascular Endothelial Growth Factor Receptor-2
32	Actins
32	Chromatin
32	DNA Damage
32	Electrophysiology
32	Gene Regulatory Networks
32	Interferon-gamma
32	Leukocytes, Mononuclear
32	Mitosis
32	Proto-Oncogene Proteins c-akt
32	Spinal Cord
32	Spleen
32	STAT3 Transcription Factor
31	Antigens, Ly
31	Chimera
31	History, 21st Century
31	Intracellular Signaling Peptides and Proteins
31	Ischemia
31	Oocytes
31	Oxidative Stress
31	Tissue Donors
30	Bone Regeneration
30	Chemotaxis
30	Dendritic Cells
30	Satellite Cells, Skeletal Muscle
30	Spermatogonia
30	Tumor Suppressor Proteins
30	Xenograft Model Antitumor Assays
29	Cell Cycle Proteins
29	Cell Dedifferentiation
29	Chick Embryo
29	Cluster Analysis
29	Dose-Response Relationship, Drug
29	Epidermis
29	Genome
29	Genome, Human
29	Immune Tolerance
29	MAP Kinase Signaling System
29	Mesencephalon
29	Mitochondria
29	Phosphatidylinositol 3-Kinases
29	Protein-Serine-Threonine Kinases
29	Proteomics
28	Cell Growth Processes
28	Drug Combinations
28	Enzyme-Linked Immunosorbent Assay
28	Graft vs Host Disease
28	History, 20th Century
28	Myocytes, Smooth Muscle
28	Neovascularization, Pathologic
28	Nerve Growth Factors
28	Pancreas
28	Paracrine Communication
28	Recovery of Function
27	Bromodeoxyuridine
27	Cell Aggregation
27	Integrases
27	Motor Neurons
27	Pyridines
27	Stage-Specific Embryonic Antigens
27	Tumor Necrosis Factor-alpha
26	Amino Acid Sequence
26	Antigens, CD31
26	Lymphocyte Activation
26	Magnetic Resonance Imaging
26	Nitric Oxide
26	Paired Box Transcription Factors
26	Protein Isoforms
25	Cartilage
25	Cattle
25	Disease Progression
25	Embryo Culture Techniques
25	Epithelium, Corneal
25	Forkhead Transcription Factors
25	Glial Fibrillary Acidic Protein
25	Macaca mulatta
25	Oxygen
25	Protein Kinase Inhibitors
25	Proteins
25	RNA
25	RNA-Binding Proteins
24	Bone Morphogenetic Protein 2
24	Ectoderm
24	Endothelium, Vascular
24	Genetic Engineering
24	Immunoblotting
24	Interleukin-6
24	Mammary Glands, Animal
24	Mice, Inbred ICR
24	Parkinson Disease
24	Receptors, Cell Surface
23	Age Factors
23	Amniotic Fluid
23	Antigens, CD44
23	Blood Cells
23	Cell Line, Transformed
23	Chromatin Assembly and Disassembly
23	Epidermal Growth Factor
23	Extracellular Matrix Proteins
23	Immunomodulation
23	Immunosuppression
23	In Situ Hybridization, Fluorescence
23	Islets of Langerhans
23	Liver Regeneration
23	Mice, Mutant Strains
23	Microarray Analysis
23	Muscle Fibers, Skeletal
23	Trophoblasts
22	Antigens, CD15
22	Eye Proteins
22	Hypoxia-Inducible Factor 1, alpha Subunit
22	In Situ Hybridization
22	Membrane Glycoproteins
22	Neurodegenerative Diseases
22	Parthenogenesis
22	Patch-Clamp Techniques
22	PAX7 Transcription Factor
22	Proteome
22	rho-Associated Kinases
22	Species Specificity
22	Telomere
21	Adenoviridae
21	Aldehyde Dehydrogenase
21	Antigens, Neoplasm
21	Cerebral Cortex
21	Dental Pulp
21	DNA Repair
21	Dogs
21	Genomic Instability
21	Hematopoietic System
21	Limbus Corneae
21	Mice, Inbred Strains
21	Microscopy, Electron, Transmission
21	Neoplasm Metastasis
21	NF-kappa B
21	Osteocytes
21	Platelet-Derived Growth Factor
21	Rabbits
21	Research Design
20	Antigens, CD29
20	Child, Preschool
20	Drug Resistance, Neoplasm
20	Guided Tissue Regeneration
20	Killer Cells, Natural
20	Leukemia
20	Methylation
20	Plasmids
20	Translational Medical Research
20	Transplantation Conditioning
19	Antibodies, Monoclonal
19	Cloning, Organism
19	Computational Biology
19	Cyclin-Dependent Kinase Inhibitor p21
19	Dermis
19	Diabetes Mellitus, Experimental
19	Electroporation
19	Gene Deletion
19	Gene Targeting
19	Genotype
19	Hepatocyte Growth Factor
19	Hybrid Cells
19	Immunoprecipitation
19	International Cooperation
19	Lateral Ventricles
19	Lung Neoplasms
19	Phosphoproteins
19	Protein Transport
19	Real-Time Polymerase Chain Reaction
19	Stroke
19	T-Box Domain Proteins
19	Tissue Culture Techniques
18	Action Potentials
18	Animals, Genetically Modified
18	B-Lymphocytes
18	Biocompatible Materials
18	Chemokines
18	Epithelium
18	Fetal Stem Cells
18	Fibroblast Growth Factors
18	Leukemia, Myeloid, Acute
18	Luminescent Proteins
18	Mass Spectrometry
18	Mitogen-Activated Protein Kinase 3
18	Morphogenesis
18	NIH 3T3 Cells
18	Polycomb-Group Proteins
18	Stress, Physiological
18	Tissue Banks
18	Transforming Growth Factor beta1
17	Amnion
17	Antibodies
17	ATP-Binding Cassette Transporters
17	Bioethical Issues
17	Brain Injuries
17	Fluorescent Dyes
17	Glycogen Synthase Kinase 3
17	Graft Rejection
17	Hindlimb
17	Infant
17	Mammary Glands, Human
17	Membrane Potentials
17	Mitogen-Activated Protein Kinase 1
17	Myelin Sheath
17	Myocardial Ischemia
17	Neoplasms, Experimental
17	Organogenesis
17	Polycomb Repressive Complex 1
17	Protein Processing, Post-Translational
17	Spermatogenesis
17	Thrombopoietin
17	Tubulin
16	Benzamides
16	Bioethics
16	Biological Assay
16	Chickens
16	Core Binding Factor Alpha 1 Subunit
16	Diabetes Mellitus, Type 1
16	DNA, Complementary
16	Drosophila
16	Drosophila Proteins
16	Drug Evaluation, Preclinical
16	Guidelines as Topic
16	HeLa Cells
16	Hydrogen Peroxide
16	Macaca fascicularis
16	Models, Genetic
16	Neural Plate
16	p38 Mitogen-Activated Protein Kinases
16	Rats, Inbred Lew
16	Receptor, Epidermal Growth Factor
16	Recombination, Genetic
16	Retinal Pigment Epithelium
16	T-Lymphocytes, Regulatory
16	Thymus Gland
15	Acetylation
15	Amides
15	Anoxia
15	beta-Galactosidase
15	Caspase 3
15	Cell Size
15	Cerebral Ventricles
15	Doxycycline
15	Genetic Markers
15	Glucose
15	Intestines
15	Isoenzymes
15	Lysophospholipids
15	Macrophages
15	Muscle Cells
15	Muscles
15	PPAR gamma
15	Protein Structure, Tertiary
15	Pyrimidines
15	Receptor, Notch1
15	Receptors, G-Protein-Coupled
15	Societies, Scientific
15	Transplantation Chimera
15	Wnt1 Protein
15	Wnt3 Protein
14	Adaptor Proteins, Signal Transducing
14	Antigens, CD38
14	Autocrine Communication
14	Calcium Signaling
14	Cloning, Molecular
14	Cornea
14	Dentate Gyrus
14	DNA (Cytosine-5-)-Methyltransferase
14	DNA, Mitochondrial
14	Electrophoresis, Gel, Two-Dimensional
14	G1 Phase
14	Genomic Imprinting
14	Growth Substances
14	In Situ Nick-End Labeling
14	Insulin-Like Growth Factor I
14	Integrins
14	Intestinal Mucosa
14	Leukocytes
14	Ligands
14	LIM-Homeodomain Proteins
14	Liver Diseases
14	Lymphocytes
14	Megakaryocytes
14	Melanocytes
14	Mitogen-Activated Protein Kinases
14	Muscle Proteins
14	Myeloid Cells
14	Myocardial Contraction
14	Neoplasm Invasiveness
14	Nodal Protein
14	Ovary
14	Periodontal Ligament
14	Prosencephalon
14	Prostate
14	Radiation, Ionizing
14	Rats, Nude
14	S Phase
14	Smad2 Protein
14	Stem Cell Factor
14	Survival Analysis
14	TOR Serine-Threonine Kinases
13	Alleles
13	Amyloid Precursor Protein Secretases
13	Antigens, CD24
13	Benzimidazoles
13	Blood Banks
13	Blotting, Southern
13	Cardiovascular Diseases
13	Cartilage, Articular
13	Cell Polarity
13	Colonic Neoplasms
13	Cytological Techniques
13	Cytoskeleton
13	Embryonal Carcinoma Stem Cells
13	Epitopes
13	Fertilization in Vitro
13	gamma-Aminobutyric Acid
13	Gap Junctions
13	Gene Knockout Techniques
13	Heart Diseases
13	Hepatocyte Nuclear Factor 3-beta
13	HLA Antigens
13	HMGB Proteins
13	Integrin alpha6
13	Karyotype
13	Liver Neoplasms
13	Lysine
13	Microtubule-Associated Proteins
13	Monocytes
13	Nervous System Diseases
13	Organ Culture Techniques
13	Prostatic Neoplasms
13	Protein Biosynthesis
13	Research Support as Topic
13	Sequence Analysis, DNA
13	Sheep
13	Superoxide Dismutase
12	alpha-Fetoproteins
12	Axons
12	Binding Sites
12	Blastomeres
12	Body Patterning
12	Brain Tissue Transplantation
12	Chromosome Aberrations
12	Chromosomes, Human
12	Collagen Type II
12	Core Binding Factor Alpha 2 Subunit
12	Dioxoles
12	Dipeptides
12	Drosophila melanogaster
12	Fetal Proteins
12	Fluorouracil
12	Follow-Up Studies
12	Foreskin
12	HEK293 Cells
12	Hematologic Neoplasms
12	High Mobility Group Proteins
12	Histone Deacetylase Inhibitors
12	Luciferases
12	Mammals
12	Microsatellite Repeats
12	Morpholines
12	Myoblasts
12	Pericytes
12	Periodicals as Topic
12	Polymorphism, Single Nucleotide
12	PTEN Phosphohydrolase
12	Receptor, Platelet-Derived Growth Factor alpha
12	Reperfusion Injury
12	Skull
12	Stress, Mechanical
12	Tendons
12	Tissue Distribution
12	Whole-Body Irradiation
11	Adenosine Triphosphate
11	Algorithms
11	Biopsy
11	Blastocyst Inner Cell Mass
11	Calcification, Physiologic
11	CD4-Positive T-Lymphocytes
11	Chemokines, CXC
11	Chimerism
11	Chromosomal Proteins, Non-Histone
11	Chronic Disease
11	Corneal Diseases
11	CpG Islands
11	Dinoprostone
11	Embryo, Nonmammalian
11	Epithelial-Mesenchymal Transition
11	Erythropoietin
11	Gene Knock-In Techniques
11	Government Regulation
11	Heart Function Tests
11	Histocompatibility Antigens Class I
11	Injections, Intravenous
11	Interleukin-8
11	Janus Kinases
11	Keratins
11	Lymphocyte Culture Test, Mixed
11	Mammary Neoplasms, Animal
11	Mice, Inbred C3H
11	Microglia
11	Motor Activity
11	Mutagenesis, Insertional
11	MyoD Protein
11	Nerve Degeneration
11	Nervous System
11	Neurites
11	Nitriles
11	Protein Kinases
11	RNA, Untranslated
11	Serum
11	Smad Proteins
11	SOX9 Transcription Factor
11	SOXF Transcription Factors
11	Synapses
11	Tumor Burden
11	Tyrosine 3-Monooxygenase
11	Vimentin
11	Wnt3A Protein
11	X Chromosome Inactivation
11	Zebrafish
10	Alternative Splicing
10	Antigens, Thy-1
10	Apoptosis Regulatory Proteins
10	Azacitidine
10	Behavior, Animal
10	Biology
10	Bioreactors
10	Biotechnology
10	Butadienes
10	Carcinoma
10	Case-Control Studies
10	CD8-Positive T-Lymphocytes
10	Chromosome Mapping
10	Collagen Type I
10	Cytoprotection
10	Diabetes Mellitus
10	Drug Synergism
10	Embryonic Induction
10	Endothelium
10	Enhancer Elements, Genetic
10	Erythroid Cells
10	Ethics, Research
10	Fibroblast Growth Factor 4
10	Gastrointestinal Tract
10	Gene Expression Regulation, Enzymologic
10	Genomics
10	Granulocyte-Macrophage Colony-Stimulating Factor
10	Heart Ventricles
10	Immunity, Innate
10	Indoleamine-Pyrrole 2,3,-Dioxygenase
10	Indoles
10	Interleukin-10
10	Intracellular Space
10	Ion Channels
10	Leukemia, Myelogenous, Chronic, BCR-ABL Positive
10	Lipopolysaccharides
10	Luminescent Measurements
10	Magnetics
10	Matrix Metalloproteinases
10	Myosin Heavy Chains
10	Neuroepithelial Cells
10	Neutrophils
10	Nitric Oxide Synthase Type II
10	Polycomb Repressive Complex 2
10	Primates
10	Receptors, Transforming Growth Factor beta
10	Research Embryo Creation
10	Retinal Diseases
10	Retinoblastoma Protein
10	Tamoxifen
10	Umbilical Veins
10	Ventricular Function, Left
10	Wnt Signaling Pathway
9	Acute Disease
9	Antigens, Tumor-Associated, Carbohydrate
9	Antioxidants
9	Biological Specimen Banks
9	Blood Platelets
9	Brain Ischemia
9	Cell Tracking
9	Corpus Striatum
9	Cyclic AMP
9	Cyclin D1
9	Cyclin-Dependent Kinase 2
9	Cyclooxygenase 2
9	Dextrans
9	Dimethyl Sulfoxide
9	DNA Helicases
9	DNA Replication
9	Drug Delivery Systems
9	Echocardiography
9	Erythrocytes
9	Erythropoiesis
9	Feeder Cells
9	Fluorescence
9	Gamma Rays
9	Gene Dosage
9	Genes, Transgenic, Suicide
9	Glycosaminoglycans
9	Glycosphingolipids
9	Heterocyclic Compounds
9	HIV-1
9	Horses
9	Immune System
9	Immunologic Factors
9	Immunosuppressive Agents
9	Inflammation Mediators
9	Infusions, Intravenous
9	Islets of Langerhans Transplantation
9	Kidney Diseases
9	Matrix Metalloproteinase 9
9	Mice, 129 Strain
9	Mice, Inbred CBA
9	Microscopy, Electron
9	Muscular Dystrophies
9	Myelodysplastic Syndromes
9	Myeloid Progenitor Cells
9	National Institutes of Health (U.S.)
9	Nuclear Receptor Subfamily 4, Group A, Member 2
9	Oligopeptides
9	Osteoarthritis
9	Parkinsonian Disorders
9	Patents as Topic
9	Peptide Elongation Factor 1
9	Peptide Fragments
9	Phagocytosis
9	Piperazines
9	Principal Component Analysis
9	Prognosis
9	Quality Control
9	Radiation Tolerance
9	Receptors, Retinoic Acid
9	Receptors, Thrombopoietin
9	Research
9	RNA, Long Untranslated
9	Sequence Homology, Amino Acid
9	Serotonin
9	Skin Neoplasms
9	Smad3 Protein
9	Small Molecule Libraries
9	Solubility
9	Spectrometry, Mass, Matrix-Assisted Laser Desorption-Ionization
9	Sphingosine
9	STAT Transcription Factors
9	Transcriptome
9	Zinc Fingers
8	Actin Cytoskeleton
8	Amyotrophic Lateral Sclerosis
8	Aneuploidy
8	Angiogenesis Inducing Agents
8	Bacterial Proteins
8	Blood Glucose
8	C-Peptide
8	Calcium Channels, L-Type
8	Carcinoma, Embryonal
8	Carcinoma, Hepatocellular
8	Cerebellum
8	Combined Modality Therapy
8	Cryoprotective Agents
8	Cyclin-Dependent Kinase Inhibitor p16
8	Cytoplasm
8	Dopaminergic Neurons
8	Erythroid Precursor Cells
8	Exons
8	Fibrosis
8	Freezing
8	GATA4 Transcription Factor
8	Genes, Developmental
8	Genetic Techniques
8	Genome-Wide Association Study
8	Gestational Age
8	Glial Cell Line-Derived Neurotrophic Factor
8	GPI-Linked Proteins
8	Granulocytes
8	Heart Failure
8	Hemangioblasts
8	Hyaluronic Acid
8	Hydroxamic Acids
8	Hyperglycemia
8	Image Processing, Computer-Assisted
8	Interleukin-2 Receptor alpha Subunit
8	JNK Mitogen-Activated Protein Kinases
8	Lipoproteins, LDL
8	Liver Cirrhosis
8	Luciferases, Firefly
8	Mast Cells
8	Microscopy, Electron, Scanning
8	Mitogens
8	Molecular Biology
8	Multiple Myeloma
8	Muscular Dystrophy, Animal
8	Myogenic Regulatory Factors
8	Neural Cell Adhesion Molecules
8	Neuropeptides
8	Olfactory Mucosa
8	Osteocalcin
8	Osteoclasts
8	Ovarian Neoplasms
8	Polymorphism, Genetic
8	Proto-Oncogene Proteins c-bcl-2
8	Proto-Oncogene Proteins c-sis
8	Public Policy
8	Purines
8	Random Allocation
8	Receptors, Chemokine
8	Recurrence
8	Rhodopsin
8	Risk Assessment
8	Schwann Cells
8	Single-Cell Analysis
8	Spermatozoa
8	Telencephalon
8	Tissue and Organ Harvesting
8	Virus Integration
8	Xenopus laevis
7	3' Untranslated Regions
7	3T3 Cells
7	Active Transport, Cell Nucleus
7	Alzheimer Disease
7	Antigen-Presenting Cells
7	Antigens
7	Antigens, CD95
7	Aorta
7	Basement Membrane
7	Bone Diseases
7	Brain Diseases
7	Brain-Derived Neurotrophic Factor
7	Calcium Channel Blockers
7	Cardiovascular System
7	Cell Compartmentation
7	Chromones
7	Congresses as Topic
7	Cricetinae
7	Cyclic GMP
7	Cyclin-Dependent Kinase Inhibitor p27
7	Cytoskeletal Proteins
7	Cytotoxicity, Immunologic
7	DEAD-box RNA Helicases
7	Demyelinating Diseases
7	Dipeptidyl Peptidase 4
7	Drug Resistance
7	Ethics, Medical
7	Ferumoxytol
7	Gene Library
7	Genetic Predisposition to Disease
7	Glucagon
7	Heat-Shock Proteins
7	Heparitin Sulfate
7	Histone Deacetylases
7	Histone-Lysine N-Methyltransferase
7	Imaging, Three-Dimensional
7	Imidazoles
7	Immunoenzyme Techniques
7	Implants, Experimental
7	Injections
7	Lasers
7	Life
7	Lipid Metabolism
7	Lung Injury
7	Magnetite Nanoparticles
7	Major Histocompatibility Complex
7	Mechanotransduction, Cellular
7	Meiosis
7	Melanoma
7	Mice, Inbred mdx
7	Microscopy
7	Multiple Sclerosis
7	Myocardial Reperfusion Injury
7	Nerve Tissue
7	Neurotransmitter Agents
7	Oncogene Proteins, Fusion
7	Ovarian Follicle
7	Oxides
7	Oxidopamine
7	Ploidies
7	Polymers
7	Preimplantation Diagnosis
7	Primary Cell Culture
7	Proliferating Cell Nuclear Antigen
7	Protein Kinase C
7	Protein Stability
7	Protein Subunits
7	Pyrazoles
7	rac1 GTP-Binding Protein
7	ras Proteins
7	Rats, Transgenic
7	Receptor, Platelet-Derived Growth Factor beta
7	Receptors, Cytoplasmic and Nuclear
7	Receptors, Erythropoietin
7	Religion
7	Subcellular Fractions
7	Survival Rate
7	Th2 Cells
7	Toll-Like Receptors
7	Transplantation Immunology
7	Transplantation, Isogeneic
7	Tumor Microenvironment
7	Ubiquitin-Protein Ligases
7	Vascular Cell Adhesion Molecule-1
7	Ventricular Remodeling
7	Work
6	Adipose Tissue, White
6	Albumins
6	Amyloid beta-Protein Precursor
6	Anti-Inflammatory Agents
6	Antigens, CD146
6	Autoimmunity
6	bcl-2-Associated X Protein
6	Body Weight
6	Capillaries
6	Cardiotonic Agents
6	Cartilage Diseases
6	Caspases
6	Cell Migration Assays
6	Central Nervous System Diseases
6	Chromatography, Liquid
6	Chromosomal Instability
6	Chromosomes, Mammalian
6	Collagenases
6	Colon
6	Connexins
6	Conserved Sequence
6	Coronary Vessels
6	Cyclins
6	Cytomegalovirus
6	Dental Sac
6	Drug Design
6	Drug Discovery
6	Drug Industry
6	Electric Stimulation
6	Electrophoretic Mobility Shift Assay
6	Estradiol
6	Fibronectins
6	Fluoresceins
6	fms-Like Tyrosine Kinase 3
6	Focal Adhesions
6	Fusion Proteins, bcr-abl
6	G2 Phase
6	Ganglia, Spinal
6	GATA6 Transcription Factor
6	Gene Expression Regulation, Leukemic
6	Genes, myc
6	Glutamic Acid
6	Glycolysis
6	Growth Inhibitors
6	GTP-Binding Proteins
6	Haplorhini
6	Hematologic Diseases
6	Heterozygote
6	High-Throughput Screening Assays
6	Histocompatibility Antigens Class II
6	Hypoxia-Ischemia, Brain
6	Immune System Diseases
6	Immunity
6	Immunoglobulin G
6	Immunoglobulin J Recombination Signal Sequence-Binding Protein
6	Immunoglobulins
6	Immunomagnetic Separation
6	Infarction, Middle Cerebral Artery
6	Infertility, Male
6	Informed Consent
6	Inhibitor of Apoptosis Proteins
6	Inhibitor of Differentiation Protein 1
6	Interleukin-3
6	Introns
6	Iron
6	Janus Kinase 2
6	Kidney Tubules
6	Lac Operon
6	Lactic Acid
6	Larva
6	Legislation as Topic
6	Liver Transplantation
6	Lymphopoiesis
6	Lysosomes
6	Mammary Neoplasms, Experimental
6	Maternal-Fetal Exchange
6	Matrix Metalloproteinase 2
6	Medulloblastoma
6	Membrane Potential, Mitochondrial
6	Methods
6	Microscopy, Phase-Contrast
6	Microscopy, Video
6	Muscle, Smooth, Vascular
6	Mutagenesis, Site-Directed
6	Myelopoiesis
6	Myeloproliferative Disorders
6	Myoblasts, Skeletal
6	NADPH Oxidase
6	Nanoparticles
6	Neurofilament Proteins
6	Neuronal Plasticity
6	Olfactory Bulb
6	Oncogene Protein v-akt
6	Oocyte Donation
6	Organ Size
6	Oryzias
6	Osteopontin
6	Osteoporosis
6	Oxidation-Reduction
6	Oxygen Consumption
6	Pancreatic Ducts
6	Papio
6	Photoreceptor Cells
6	Photoreceptor Cells, Vertebrate
6	Platelet Membrane Glycoprotein IIb
6	Potassium Channels, Inwardly Rectifying
6	Public Opinion
6	Receptor, TIE-2
6	Receptors, Lysophosphatidic Acid
6	Reference Standards
6	Reference Values
6	Retinal Degeneration
6	Retinal Rod Photoreceptor Cells
6	rhoA GTP-Binding Protein
6	Risk Factors
6	Sensitivity and Specificity
6	Sialoglycoproteins
6	Sodium Channels
6	STAT5 Transcription Factor
6	Sus scrofa
6	Tandem Mass Spectrometry
6	TCF Transcription Factors
6	Tendon Injuries
6	Time-Lapse Imaging
6	Totipotent Stem Cells
6	Trachea
6	Transforming Growth Factor beta3
6	Transplantation Tolerance
6	Vitronectin
6	von Willebrand Factor
5	5'-Nucleotidase
5	Activin Receptors, Type I
5	Acute Kidney Injury
5	Adaptation, Biological
5	Amyloid beta-Peptides
5	Anti-Inflammatory Agents, Non-Steroidal
5	Antibody Specificity
5	Antigen Presentation
5	Antigens, CD14
5	Antigens, CD4
5	Artifacts
5	Ascorbic Acid
5	Autoantigens
5	Autoimmune Diseases
5	Basic Helix-Loop-Helix Leucine Zipper Transcription Factors
5	Blood-Brain Barrier
5	Bone Neoplasms
5	Busulfan
5	Butyrates
5	Caffeine
5	Calcium-Binding Proteins
5	Callithrix
5	Calreticulin
5	cdc42 GTP-Binding Protein
5	Cell Biology
5	Cell Fractionation
5	Chromosome Segregation
5	Cochlea
5	Connexin 43
5	Contrast Media
5	Cricetulus
5	Cyclic Nucleotide-Gated Cation Channels
5	Cyclin-Dependent Kinase Inhibitor p57
5	Cytokine Receptor gp130
5	Diagnostic Imaging
5	DNA Mutational Analysis
5	DNA Transposable Elements
5	Dystrophin
5	Electrophoresis, Polyacrylamide Gel
5	Electrophysiological Phenomena
5	Embryo Implantation
5	Endocytosis
5	Endopeptidases
5	Enzyme Activators
5	Ependyma
5	Fas Ligand Protein
5	Fibrin
5	Flavonoids
5	Fracture Healing
5	GATA1 Transcription Factor
5	GATA2 Transcription Factor
5	Gels
5	Genes, Homeobox
5	Genes, ras
5	Genes, Tumor Suppressor
5	Genetic Loci
5	Gingiva
5	Gonads
5	Hematopoiesis, Extramedullary
5	Heme Oxygenase-1
5	Hemodynamics
5	Histocompatibility Antigens
5	Histocompatibility Testing
5	HIV Infections
5	HLA-DR Antigens
5	Homozygote
5	HSP70 Heat-Shock Proteins
5	Hypertension, Pulmonary
5	Immunocompromised Host
5	Interleukin-1beta
5	Interleukin-4
5	Interleukin-7
5	Interleukins
5	Internet
5	Intestine, Small
5	Jumonji Domain-Containing Histone Demethylases
5	Ki-67 Antigen
5	Leukemia, Erythroblastic, Acute
5	Leukodystrophy, Globoid Cell
5	Lipids
5	Liver Function Tests
5	Lymphoma, Non-Hodgkin
5	Matrix Metalloproteinase Inhibitors
5	Microdissection
5	Mitotic Spindle Apparatus
5	Molecular Imaging
5	Mouth Mucosa
5	Musculoskeletal System
5	Myelin Basic Protein
5	Myelin Proteins
5	Myogenic Regulatory Factor 5
5	Myosins
5	Neoplasm Recurrence, Local
5	Neostriatum
5	Nicotine
5	Nitric Oxide Synthase Type III
5	Oogenesis
5	Oxidants
5	Pancreas, Exocrine
5	Pancreatic Neoplasms
5	Perfusion
5	Periodontium
5	Peripheral Blood Stem Cell Transplantation
5	Phosphoric Monoester Hydrolases
5	Polysaccharides
5	Practice Guidelines as Topic
5	Primary Myelofibrosis
5	Prospective Studies
5	Prostheses and Implants
5	Protease Inhibitors
5	Proteasome Endopeptidase Complex
5	Protein Array Analysis
5	Protein-Tyrosine Kinases
5	Quinazolines
5	Radiation Chimera
5	Receptors, Fibroblast Growth Factor
5	Receptors, Immunologic
5	Receptors, Transferrin
5	Receptors, Vascular Endothelial Growth Factor
5	Response Elements
5	Retinal Dehydrogenase
5	Retinoblastoma-Like Protein p130
5	S100 Proteins
5	Sarcoma
5	Sequence Alignment
5	Sertoli Cells
5	Specimen Handling
5	Spinal Cord Regeneration
5	Subcutaneous Fat
5	T-Lymphocytes, Cytotoxic
5	Testicular Neoplasms
5	Th1 Cells
5	Tissue Fixation
5	TNF-Related Apoptosis-Inducing Ligand
5	United States Food and Drug Administration
5	Uterus
5	Weightlessness
5	Wounds and Injuries
5	Zebrafish Proteins
4	ABO Blood-Group System
4	Adenocarcinoma
4	Adiponectin
4	Aging, Premature
4	Analysis of Variance
4	Androgens
4	Angiogenic Proteins
4	Angiopoietin-1
4	Annexin A5
4	Antigens, CD19
4	Antigens, CD56
4	Antigens, CD80
4	Antigens, Polyomavirus Transforming
4	Antineoplastic Agents, Phytogenic
4	Antineoplastic Combined Chemotherapy Protocols
4	Awards and Prizes
4	bcl-X Protein
4	Bile Ducts
4	Biological Evolution
4	Blood Proteins
4	Bone Remodeling
4	Bone Resorption
4	Breast
4	Bucladesine
4	Calcineurin
4	Camptothecin
4	Carbon Tetrachloride
4	Carcinoma, Squamous Cell
4	CCAAT-Enhancer-Binding Protein-beta
4	Cell Surface Extensions
4	Cell Transformation, Viral
4	Cellular Microenvironment
4	Centrifugation, Density Gradient
4	Centrosome
4	Cerebral Infarction
4	Chemokines, CC
4	CHO Cells
4	Cholesterol
4	Chondroitin Sulfates
4	Choristoma
4	Chromosomes, Artificial, Bacterial
4	Cicatrix
4	Ciliary Neurotrophic Factor
4	Cisplatin
4	Collagen Type IV
4	Colorectal Neoplasms
4	Computer Simulation
4	Concanavalin A
4	Connective Tissue Cells
4	Cooperative Behavior
4	Creatinine
4	Cues
4	Cyclic AMP Response Element-Binding Protein
4	Cyclic GMP-Dependent Protein Kinases
4	Cystic Fibrosis Transmembrane Conductance Regulator
4	Cytochrome P-450 Enzyme System
4	Databases, Genetic
4	Dexamethasone
4	Disease
4	Dissection
4	DNA Breaks, Double-Stranded
4	DNA Copy Number Variations
4	Electric Conductivity
4	Electricity
4	Embryo Disposition
4	Embryo Transfer
4	Encephalomyelitis, Autoimmune, Experimental
4	Endometrium
4	Energy Metabolism
4	Escherichia coli
4	European Union
4	Eye
4	Family
4	Feasibility Studies
4	Fetal Tissue Transplantation
4	Fibroblast Growth Factor 8
4	Forecasting
4	Fractures, Bone
4	Fragile X Mental Retardation Protein
4	Fragile X Syndrome
4	Free Radical Scavengers
4	Frizzled Receptors
4	G1 Phase Cell Cycle Checkpoints
4	Gangliosides
4	Gastrula
4	Gastrulation
4	Genes
4	Genes, Dominant
4	Genes, Essential
4	Genes, p53
4	Genetic Association Studies
4	Glial Cell Line-Derived Neurotrophic Factor Receptors
4	Gliosis
4	Goats
4	Granulosa Cells
4	Hair Cells, Auditory
4	Health
4	Health Policy
4	Heparan Sulfate Proteoglycans
4	HMGA2 Protein
4	Hydrogels
4	Hydroxymethylglutaryl-CoA Reductase Inhibitors
4	Hyperplasia
4	Immunotherapy
4	Indicators and Reagents
4	Injections, Intraperitoneal
4	Injections, Subcutaneous
4	Insulin-Like Growth Factor II
4	Interferon-alpha
4	Interferon-beta
4	Interleukin-2
4	Interleukin-3 Receptor alpha Subunit
4	Interneurons
4	Jurkat Cells
4	K562 Cells
4	Kaplan-Meier Estimate
4	Keratin-18
4	Kidney Failure, Chronic
4	LDL-Receptor Related Proteins
4	Leukemia, Experimental
4	Leukemia, Myeloid
4	Liposomes
4	Lung Diseases
4	Lymphocyte Count
4	Magnetic Resonance Spectroscopy
4	Memory
4	Metabolic Networks and Pathways
4	Metal Nanoparticles
4	Mice, Inbred DBA
4	Microspheres
4	Microvessels
4	Mitochondrial Proteins
4	Models, Theoretical
4	Mucous Membrane
4	Multigene Family
4	Muscular Diseases
4	Mutagenesis
4	Myeloid-Lymphoid Leukemia Protein
4	Myosin Light Chains
4	Nanofibers
4	Nanotechnology
4	Neprilysin
4	Neurofibromin 1
4	NG-Nitroarginine Methyl Ester
4	Nifedipine
4	Nitric Oxide Donors
4	Nitric Oxide Synthase
4	Odontoblasts
4	Odontogenesis
4	Oncogene Proteins
4	Oncogenes
4	Organoplatinum Compounds
4	Osteonectin
4	Ovum
4	Oximes
4	Oxytocin
4	Patient Selection
4	Pericardium
4	Periodontal Diseases
4	Podocytes
4	Poly(ADP-ribose) Polymerases
4	Polyglycolic Acid
4	Potassium Channels
4	Pregnancy Trimester, First
4	Primitive Streak
4	Prosthesis Implantation
4	Proto-Oncogene Proteins c-jun
4	Purkinje Cells
4	Quail
4	Receptor Protein-Tyrosine Kinases
4	Receptors, CXCR
4	Receptors, Lysosphingolipid
4	Receptors, Nerve Growth Factor
4	Reconstructive Surgical Procedures
4	Reproductive Techniques, Assisted
4	Respiratory Mucosa
4	Respiratory System
4	Retinoblastoma-Like Protein p107
4	Retrospective Studies
4	Risk
4	Ryanodine Receptor Calcium Release Channel
4	Salivary Glands
4	Sarcoplasmic Reticulum
4	Sciatic Nerve
4	Sequence Deletion
4	Serine
4	Serum Albumin
4	Sialic Acids
4	Simian virus 40
4	Simplexvirus
4	Sirtuin 1
4	Skin Physiological Phenomena
4	Skin Transplantation
4	Smad1 Protein
4	Sodium-Calcium Exchanger
4	Software
4	Somites
4	SOX Transcription Factors
4	Spectroscopy, Fourier Transform Infrared
4	STAT1 Transcription Factor
4	Streptozocin
4	Surface Properties
4	Swine, Miniature
4	Synaptic Transmission
4	T-Lymphocyte Subsets
4	T-Lymphocytes, Helper-Inducer
4	Temperature
4	Tenascin
4	Terminology as Topic
4	Th17 Cells
4	Thiazolidinediones
4	Thymidine Kinase
4	Tight Junctions
4	Time
4	Tissue Array Analysis
4	Tooth
4	Tooth, Deciduous
4	Toxicity Tests
4	Transforming Growth Factor alpha
4	Tropism
4	Troponin I
4	Twist Transcription Factor
4	Tyrphostins
4	Ultraviolet Rays
4	Urea
4	Valproic Acid
4	Veratrum Alkaloids
4	Virus Replication
4	Vitamin A
4	X Chromosome
4	Xenopus Proteins
3	5' Untranslated Regions
3	Abdominal Fat
3	Acetylcysteine
3	Acquired Immunodeficiency Syndrome
3	Adaptation, Physiological
3	Adenomatous Polyposis Coli
3	Adenomatous Polyposis Coli Protein
3	Adjuvants, Immunologic
3	Amino Acid Chloromethyl Ketones
3	Anaerobiosis
3	Anemia
3	Anemia, Aplastic
3	Angiotensin II
3	Antibodies, Blocking
3	Antibody Formation
3	Antigens, CD11b
3	Antigens, CD40
3	Antigens, CD9
3	Antigens, Differentiation, Myelomonocytic
3	Antigens, Differentiation, T-Lymphocyte
3	Antineoplastic Agents, Alkylating
3	Arteries
3	Arthritis, Rheumatoid
3	Asthma
3	Asymmetric Cell Division
3	Autophagy
3	beta-Globins
3	Biological Clocks
3	Biomechanics
3	Birds
3	Blastula
3	Blood Circulation
3	Blood Component Removal
3	Blood Donors
3	Blood Pressure
3	Blood Transfusion
3	Bone Development
3	Bone Matrix
3	Bone Morphogenetic Protein Receptors
3	Bronchi
3	Bronchioles
3	Calcium Channels
3	Calcium Phosphates
3	Calcium-Calmodulin-Dependent Protein Kinase Type 2
3	Capillary Permeability
3	Carcinoma, Non-Small-Cell Lung
3	Cardiomegaly
3	Cardiomyopathies
3	Cardiomyopathy, Dilated
3	Cardiomyoplasty
3	Cardiotoxins
3	CCAAT-Enhancer-Binding Protein-alpha
3	cdc25 Phosphatases
3	Cell Engineering
3	Cercopithecus aethiops
3	Cervical Vertebrae
3	Chelating Agents
3	Chemokine CCL2
3	Choline O-Acetyltransferase
3	Chondroitin Sulfate Proteoglycans
3	Chromatography, High Pressure Liquid
3	Chromosomes
3	Chromosomes, Human, Pair 13
3	Ciliary Body
3	Circadian Rhythm
3	Clinical Trials, Phase I as Topic
3	Cohort Studies
3	Complement Activation
3	Consensus
3	Core Binding Factor beta Subunit
3	Corneal Stroma
3	Coronary Circulation
3	Cost-Benefit Analysis
3	Cyclin D2
3	Cyclin E
3	Cyclin-Dependent Kinase 4
3	Cyclooxygenase 2 Inhibitors
3	Dacarbazine
3	Decidua
3	Dental Cementum
3	Deoxyglucose
3	Dependovirus
3	Developmental Biology
3	Diabetes Mellitus, Type 2
3	Dietary Fats
3	Digestive System
3	Dipeptidyl-Peptidase IV Inhibitors
3	Directed Molecular Evolution
3	Disease-Free Survival
3	DNA Modification Methylases
3	DNA, Intergenic
3	DNA, Neoplasm
3	Donor Selection
3	Dose-Response Relationship, Radiation
3	Doxorubicin
3	Drug Screening Assays, Antitumor
3	Ear, Inner
3	Efficiency
3	Egtazic Acid
3	Endonucleases
3	Enzymes
3	Epilepsy, Temporal Lobe
3	Esophagus
3	Estrogens
3	Etoposide
3	Evolution, Molecular
3	Expressed Sequence Tags
3	Extremities
3	Eye Diseases
3	Fanconi Anemia
3	Fatty Acids, Monounsaturated
3	Femur
3	Ferric Compounds
3	Fertility
3	Fibroblast Growth Factor 7
3	Forskolin
3	Galactosylceramidase
3	Galectin 1
3	Ganciclovir
3	GATA3 Transcription Factor
3	Gelatin
3	Gene Rearrangement
3	Genes, cdc
3	Genes, Neoplasm
3	Genes, p16
3	Genetic Diseases, Inborn
3	Genetic Testing
3	Giant Cells
3	Globins
3	Glutathione
3	Glutathione Peroxidase
3	Glycogen
3	Glycolates
3	Glycosyltransferases
3	Graft vs Leukemia Effect
3	Granulocyte-Macrophage Progenitor Cells
3	Granzymes
3	Haploidy
3	Haplotypes
3	Heart Conduction System
3	Heart Transplantation
3	Hemophilia A
3	Hepacivirus
3	Heparin
3	Histocompatibility
3	Histone Acetyltransferases
3	HLA-G Antigens
3	Huntington Disease
3	Hydrogel
3	Immunity, Cellular
3	Immunoglobulin M
3	Immunologic Deficiency Syndromes
3	Immunologic Memory
3	Infusions, Intraosseous
3	Inositol 1,4,5-Trisphosphate Receptors
3	Integrin alpha Chains
3	Integrin alpha2
3	Integrin alpha4
3	Integrin alpha5beta1
3	Integrin alphaV
3	Integrin-Binding Sialoprotein
3	Intellectual Property
3	Intercellular Adhesion Molecule-1
3	Intercellular Junctions
3	Interleukin-17
3	Internationality
3	Intestinal Neoplasms
3	Keratin-14
3	Keratin-15
3	Keratin-19
3	Keratin-7
3	Keratin-8
3	Kidney Function Tests
3	Knee Injuries
3	Knee Joint
3	Knowledge Bases
3	Laboratories
3	Laser-Doppler Flowmetry
3	Lectins, C-Type
3	Left-Right Determination Factors
3	Leptin
3	Leupeptins
3	Lidocaine
3	Ligaments
3	LIM Domain Proteins
3	Lupus Erythematosus, Systemic
3	Lymphocyte Transfusion
3	Lymphokines
3	Lymphoma
3	Macular Degeneration
3	MADS Domain Proteins
3	Mammary Tumor Virus, Mouse
3	Mandible
3	MAP Kinase Kinase 1
3	Matrix Metalloproteinase 14
3	Mesonephros
3	Meta-Analysis as Topic
3	Metabolic Detoxication, Drug
3	Metabolism
3	Mice, Congenic
3	Microinjections
3	Mitogen-Activated Protein Kinase 14
3	Mitogen-Activated Protein Kinase Kinases
3	Mitomycin
3	Molecular Targeted Therapy
3	Motor Neuron Disease
3	MSX1 Transcription Factor
3	Multiprotein Complexes
3	Muscle Contraction
3	Muscular Dystrophy, Duchenne
3	Mutation, Missense
3	Myoblasts, Cardiac
3	Myofibroblasts
3	Myogenin
3	N-Formylmethionine Leucyl-Phenylalanine
3	Natural Killer T-Cells
3	Necrosis
3	Neoplasms, Germ Cell and Embryonal
3	Nerve Net
3	Neural Cell Adhesion Molecule L1
3	Neural Tube
3	Neurons, Afferent
3	Neurotoxins
3	Neutralization Tests
3	Neutropenia
3	Nitroso Compounds
3	Nocodazole
3	Notochord
3	Nuclear Pore Complex Proteins
3	Nucleic Acid Conformation
3	Nucleic Acid Hybridization
3	Oligonucleotides
3	Oncolytic Virotherapy
3	Open Reading Frames
3	Organic Cation Transport Proteins
3	Organisms, Genetically Modified
3	Ossification, Heterotopic
3	Ovalbumin
3	Oxidoreductases, N-Demethylating
3	P-Glycoprotein
3	P-Selectin
3	Particle Size
3	Paxillin
3	Peptide Hydrolases
3	Periodontitis
3	Peripheral Nerves
3	Pharmaceutical Preparations
3	Phosphoprotein Phosphatases
3	Phylogeny
3	Physical Exertion
3	Pilot Projects
3	Pituitary Gland
3	Plant Lectins
3	Point Mutation
3	Point-of-Care Systems
3	Policy
3	Politics
3	Poly I-C
3	Polyethylene Glycols
3	Polyploidy
3	Positron-Emission Tomography
3	Precancerous Conditions
3	Precursor Cell Lymphoblastic Leukemia-Lymphoma
3	Precursor Cells, B-Lymphoid
3	Prenatal Diagnosis
3	Private Sector
3	Propionates
3	Prostaglandin-Endoperoxide Synthases
3	Protein Engineering
3	Protein Tyrosine Phosphatases
3	Protein-Arginine N-Methyltransferases
3	Proto-Oncogenes
3	Pseudogenes
3	Publications
3	Publishing
3	Puromycin
3	Pyrroles
3	Quantum Dots
3	Questionnaires
3	Radiation Injuries, Experimental
3	RANK Ligand
3	Receptor, Fibroblast Growth Factor, Type 1
3	Receptor, Fibroblast Growth Factor, Type 2
3	Receptor, Fibroblast Growth Factor, Type 3
3	Receptor, Nerve Growth Factor
3	Receptor, Notch2
3	Receptors, Androgen
3	Receptors, Antigen, T-Cell
3	Receptors, Antigen, T-Cell, alpha-beta
3	Receptors, Calcitriol
3	Receptors, CCR2
3	Receptors, CCR5
3	Receptors, Eph Family
3	Receptors, Growth Factor
3	Receptors, Interleukin-8B
3	Receptors, Purinergic P2
3	Receptors, TNF-Related Apoptosis-Inducing Ligand
3	Receptors, Virus
3	Registries
3	Regulatory Elements, Transcriptional
3	Regulatory Sequences, Nucleic Acid
3	Research Personnel
3	Respiratory Burst
3	Retroelements
3	Retroviridae Infections
3	Ribonuclease III
3	RNA, Neoplasm
3	Rosette Formation
3	Rotarod Performance Test
3	Ryanodine
3	Safety
3	Sarcoma, Ewing
3	Second Messenger Systems
3	Serotonin Plasma Membrane Transport Proteins
3	Severe Combined Immunodeficiency
3	Siblings
3	Side-Population Cells
3	Sirolimus
3	Skin Diseases
3	Smad4 Protein
3	Societies, Medical
3	Somatostatin
3	SOXE Transcription Factors
3	Statistics, Nonparametric
3	Stochastic Processes
3	Stroke Volume
3	Subcutaneous Tissue
3	Succinimides
3	tau Proteins
3	Tetracycline
3	Tetrodotoxin
3	Thoracic Vertebrae
3	Thrombopoiesis
3	Thymosin
3	Tissue and Organ Procurement
3	Tissue Inhibitor of Metalloproteinase-2
3	Tissue Transplantation
3	Transcription Factor 7-Like 1 Protein
3	Transforming Growth Factor beta2
3	Transposases
3	Trinucleotide Repeat Expansion
3	Trypsin
3	Tumor Stem Cell Assay
3	Ubiquitin
3	Urinary Bladder Neoplasms
3	Urothelium
3	Vacuoles
3	Vascular Diseases
3	Vascular Endothelial Growth Factor Receptor-1
3	Veins
3	Viral Proteins
3	Viruses
3	Viscera
3	Wharton Jelly
3	Whole Body Imaging
3	Women, Working
3	Xenopus
3	Y Chromosome
3	Yolk Sac
2	1-(5-Isoquinolinesulfonyl)-2-Methylpiperazine
2	3-Pyridinecarboxylic acid, 1,4-dihydro-2,6-dimethyl-5-nitro-4-(2-(trifluoromethyl)phenyl)-, Methyl ester
2	8-Bromo Cyclic Adenosine Monophosphate
2	Abscisic Acid
2	Absorptiometry, Photon
2	Acetylcholinesterase
2	Acid Phosphatase
2	Activating Transcription Factors
2	Activin Receptors
2	Activin Receptors, Type II
2	Acute Lung Injury
2	ADAM Proteins
2	Adaptive Immunity
2	Adenoma
2	Adenosine Triphosphatases
2	Adipocytes, Brown
2	Adiposity
2	Administration, Oral
2	Advisory Committees
2	Aggrecans
2	Airway Remodeling
2	Alendronate
2	Amidohydrolases
2	Amino Acid Motifs
2	Amino Acid Substitution
2	Aminoacetonitrile
2	Aminoimidazole Carboxamide
2	Amniocentesis
2	AMP-Activated Protein Kinases
2	Amyloid
2	Anemia, Diamond-Blackfan
2	Angiogenesis Inhibitors
2	Angiography
2	Angiopoietins
2	Anilides
2	Aniline Compounds
2	Anterior Cruciate Ligament
2	Anthracenes
2	Anthraquinones
2	Anti-Arrhythmia Agents
2	Antibiotics, Antineoplastic
2	Antigens, CD1
2	Antigens, CD11c
2	Antigens, CD30
2	Antigens, CD8
2	Antigens, CD86
2	Antigens, Heterophile
2	Antigens, Nuclear
2	Antihypertensive Agents
2	Antimetabolites
2	Antimetabolites, Antineoplastic
2	Antiviral Agents
2	Apoptosis Inducing Factor
2	Arachidonic Acid
2	Argonaute Proteins
2	Arrhythmias, Cardiac
2	Arsenicals
2	Atrophy
2	Attachment Sites, Microbiological
2	Automation
2	Axin Protein
2	Back
2	BALB 3T3 Cells
2	Barrett Esophagus
2	Basic-Leucine Zipper Transcription Factors
2	Behavior
2	Benzoates
2	Benzothiazoles
2	Bioartificial Organs
2	Bioengineering
2	Biomedical Technology
2	Biomimetics
2	Blast Crisis
2	Bleomycin
2	Blood Cell Count
2	Blood Specimen Collection
2	Blood Urea Nitrogen
2	Blood Vessel Prosthesis
2	Blood-Testis Barrier
2	Blotting, Northern
2	Bone Demineralization Technique
2	Bone Density
2	Bone Density Conservation Agents
2	Bone Marrow Diseases
2	Bone Morphogenetic Protein 7
2	Bone Morphogenetic Protein Receptors, Type I
2	Bone Transplantation
2	Bony Callus
2	Bowman Capsule
2	Brain Infarction
2	BRCA1 Protein
2	Bronchoalveolar Lavage Fluid
2	Buffers
2	Bystander Effect
2	Calcitriol
2	Calcium Channels, T-Type
2	Calcium-Binding Protein, Vitamin D-Dependent
2	Calmodulin
2	Carbazoles
2	Carbon Tetrachloride Poisoning
2	Carboxylesterase
2	Carcinogens
2	Carcinoma, Basal Cell
2	Cardiac Myosins
2	Career Mobility
2	Carmustine
2	Caspase 9
2	Caspase Inhibitors
2	Catalase
2	Cathelicidins
2	Caveolin 1
2	CCAAT-Enhancer-Binding Proteins
2	CCN Intercellular Signaling Proteins
2	CD40 Ligand
2	CDC2 Protein Kinase
2	Cell Cycle Checkpoints
2	Cell Extracts
2	Cell Membrane Permeability
2	Cell Nucleolus
2	Cell Respiration
2	Central Nervous System Neoplasms
2	Chemokine CCL7
2	Chemotherapy, Adjuvant
2	Chlorates
2	Chlorpyrifos
2	Cholinergic Neurons
2	Chorion
2	Chorionic Villi
2	Chromatography, Affinity
2	Chromosomes, Artificial, Human
2	Chromosomes, Human, Pair 16
2	Chromosomes, Human, Pair 17
2	Chromosomes, Human, Pair 19
2	Chromosomes, Human, X
2	Chromosomes, Human, Y
2	Cilia
2	Clathrin Heavy Chains
2	Claudins
2	Clinical Laboratory Techniques
2	Clinical Trials, Phase III as Topic
2	Cochlear Nerve
2	Comet Assay
2	Commerce
2	Computer Systems
2	Consensus Sequence
2	Consent Forms
2	Corneal Transplantation
2	Corpus Callosum
2	COS Cells
2	Coxsackie and Adenovirus Receptor-Like Membrane Protein
2	Cross Reactions
2	Culture
2	Culture Techniques
2	Cyclic ADP-Ribose
[truncated: 2,254 more rows]
